# Supplementary material for: Impact of dietary nitrate supplementation on exercise capacity and cardiovascular parameters in chronic respiratory disease: a systematic review and meta-analysis
Source: PubMed Central journal article supplement — BMJ Open Respir Res. 2021 Sep 6;8(1):e000948. doi: 10.1136/bmjresp-2021-000948 (PMC8422488; doi:10.1136/bmjresp-2021-000948), 2021-09-06
Supplement: bmjresp-2021-000948supp001.pdf [file bmjresp-2021-000948supp001.pdf]

**Appendix 1: Search strategies of specific database****Ovid MEDLINE(R) (1946 to March 2021)**

| # | Searches                                                                                                                                                                                                                                                                                                                      |
|---|-------------------------------------------------------------------------------------------------------------------------------------------------------------------------------------------------------------------------------------------------------------------------------------------------------------------------------|
| 1 | respiratory diseases.mp. [mp=title, abstract, original title, name of substance word, subject heading word, floating sub-heading word, keyword heading word, organism supplementary concept word, protocol supplementary concept word, rare disease supplementary concept word, unique identifier, synonyms]                  |
| 2 | chronic obstructive pulmonary disease.mp. [mp=title, abstract, original title, name of substance word, subject heading word, floating sub-heading word, keyword heading word, organism supplementary concept word, protocol supplementary concept word, rare disease supplementary concept word, unique identifier, synonyms] |
| 3 | COPD.mp. [mp=title, abstract, original title, name of substance word, subject heading word, floating sub-heading word, keyword heading word, organism supplementary concept word, protocol supplementary concept word, rare disease supplementary concept word, unique identifier, synonyms]                                  |
| 4 | chronic obstructive airways disease.mp. [mp=title, abstract, original title, name of substance word, subject heading word, floating sub-heading word, keyword heading word, organism supplementary concept word, protocol supplementary concept word, rare disease supplementary concept word, unique identifier, synonyms]   |
| 5 | emphysema.mp. [mp=title, abstract, original title, name of substance word, subject heading word, floating sub-heading word, keyword heading word, organism supplementary concept word, protocol supplementary concept word, rare disease supplementary concept word, unique identifier, synonyms]                             |
| 6 | bronchitis.mp. [mp=title, abstract, original title, name of substance word, subject heading word, floating sub-heading word, keyword heading word, organism supplementary concept word, protocol supplementary concept word, rare disease supplementary concept word, unique identifier, synonyms]                            |
| 7 | bronchiectasis.mp. [mp=title, abstract, original title, name of substance word, subject heading word, floating sub-heading word, keyword heading word, organism supplementary concept word, protocol supplementary concept word, rare disease supplementary concept word, unique identifier, synonyms]                        |
| 8 | interstitial lung disease.mp. [mp=title, abstract, original title, name of substance word, subject heading word, floating sub-heading word, keyword heading word, organism supplementary concept word, protocol supplementary concept word, rare disease supplementary concept word, unique identifier, synonyms]             |

|    |                                                                                                                                                                                                                                                                                                                |
|----|----------------------------------------------------------------------------------------------------------------------------------------------------------------------------------------------------------------------------------------------------------------------------------------------------------------|
| 9  | ILD.mp. [mp=title, abstract, original title, name of substance word, subject heading word, floating sub-heading word, keyword heading word, organism supplementary concept word, protocol supplementary concept word, rare disease supplementary concept word, unique identifier, synonyms]                    |
| 10 | cystic fibrosis.mp. [mp=title, abstract, original title, name of substance word, subject heading word, floating sub-heading word, keyword heading word, organism supplementary concept word, protocol supplementary concept word, rare disease supplementary concept word, unique identifier, synonyms]        |
| 11 | pulmonary hypertension.mp. [mp=title, abstract, original title, name of substance word, subject heading word, floating sub-heading word, keyword heading word, organism supplementary concept word, protocol supplementary concept word, rare disease supplementary concept word, unique identifier, synonyms] |
| 12 | PHT.mp. [mp=title, abstract, original title, name of substance word, subject heading word, floating sub-heading word, keyword heading word, organism supplementary concept word, protocol supplementary concept word, rare disease supplementary concept word, unique identifier, synonyms]                    |
| 13 | 1 or 2 or 3 or 4 or 5 or 6 or 7 or 8 or 9 or 10 or 11 or 12                                                                                                                                                                                                                                                    |
| 14 | Respiratory Tract Infections/ or Humans/ or Respiratory Tract Diseases/ or Asthma/ or Lung/ or Pulmonary Disease, Chronic Obstructive/                                                                                                                                                                         |
| 15 | Pulmonary Disease, Chronic Obstructive/                                                                                                                                                                                                                                                                        |
| 16 | Pulmonary Disease, Chronic Obstructive/                                                                                                                                                                                                                                                                        |
| 17 | Asthma/ or Pulmonary Disease, Chronic Obstructive/ or Humans/ or Lung Diseases, Obstructive/ or Adult/                                                                                                                                                                                                         |
| 18 | Emphysema/ or Pulmonary Emphysema/                                                                                                                                                                                                                                                                             |
| 19 | Bronchitis, Chronic/ or Bronchitis/                                                                                                                                                                                                                                                                            |
| 20 | Bronchiectasis/                                                                                                                                                                                                                                                                                                |
| 21 | Lung Diseases, Interstitial/                                                                                                                                                                                                                                                                                   |
| 22 | Adult/ or Humans/ or Lung Diseases, Interstitial/ or Pulmonary Fibrosis/                                                                                                                                                                                                                                       |
| 23 | Cystic Fibrosis/                                                                                                                                                                                                                                                                                               |
| 24 | Hypertension, Pulmonary/                                                                                                                                                                                                                                                                                       |
| 25 | Humans/ or Hypertension, Pulmonary/                                                                                                                                                                                                                                                                            |
| 26 | 14 or 15 or 16 or 17 or 18 or 19 or 20 or 21 or 22 or 23 or 24 or 25                                                                                                                                                                                                                                           |
| 27 | 13 and 26                                                                                                                                                                                                                                                                                                      |
| 28 | nitrate.mp. [mp=title, abstract, original title, name of substance word, subject heading word, floating sub-heading word, keyword heading word, organism supplementary concept word,                                                                                                                           |

|    |                                                                                                                                                                                                                                                                                                                 |
|----|-----------------------------------------------------------------------------------------------------------------------------------------------------------------------------------------------------------------------------------------------------------------------------------------------------------------|
|    | protocol supplementary concept word, rare disease supplementary concept word, unique identifier, synonyms]                                                                                                                                                                                                      |
| 29 | beetroot.mp. [mp=title, abstract, original title, name of substance word, subject heading word, floating sub-heading word, keyword heading word, organism supplementary concept word, protocol supplementary concept word, rare disease supplementary concept word, unique identifier, synonyms]                |
| 30 | dietary nitrate.mp. [mp=title, abstract, original title, name of substance word, subject heading word, floating sub-heading word, keyword heading word, organism supplementary concept word, protocol supplementary concept word, rare disease supplementary concept word, unique identifier, synonyms]         |
| 31 | nitrate supplementation.mp. [mp=title, abstract, original title, name of substance word, subject heading word, floating sub-heading word, keyword heading word, organism supplementary concept word, protocol supplementary concept word, rare disease supplementary concept word, unique identifier, synonyms] |
| 32 | 28 or 29 or 30 or 31                                                                                                                                                                                                                                                                                            |
| 33 | Nitrates/                                                                                                                                                                                                                                                                                                       |
| 34 | Vegetables/ or Nitrites/ or Nitrates/ or Dietary Supplements/ or Beverages/ or Humans/                                                                                                                                                                                                                          |
| 35 | Nitric Oxide/ or Nitrites/ or Diet/ or Nitrates/ or Blood Pressure/ or Humans/ or Dietary Supplements/                                                                                                                                                                                                          |
| 36 | Oxygen Consumption/ or Exercise/ or Dietary Supplements/ or Nitrites/ or Nitrates/ or Nitric Oxide/ or Humans/                                                                                                                                                                                                  |
| 37 | 33 or 34 or 35 or 36                                                                                                                                                                                                                                                                                            |
| 38 | 32 and 37                                                                                                                                                                                                                                                                                                       |
| 39 | 27 and 38                                                                                                                                                                                                                                                                                                       |

## Embase (1947 to March 2021)

| #  | Searches                                                                                                                                                                                                                         |
|----|----------------------------------------------------------------------------------------------------------------------------------------------------------------------------------------------------------------------------------|
| 1  | respiratory diseases.mp. [mp=title, abstract, heading word, drug trade name, original title, device manufacturer, drug manufacturer, device trade name, keyword, floating subheading word, candidate term word]                  |
| 2  | chronic obstructive pulmonary disease.mp. [mp=title, abstract, heading word, drug trade name, original title, device manufacturer, drug manufacturer, device trade name, keyword, floating subheading word, candidate term word] |
| 3  | COPD.mp. [mp=title, abstract, heading word, drug trade name, original title, device manufacturer, drug manufacturer, device trade name, keyword, floating subheading word, candidate term word]                                  |
| 4  | chronic obstructive airways disease.mp. [mp=title, abstract, heading word, drug trade name, original title, device manufacturer, drug manufacturer, device trade name, keyword, floating subheading word, candidate term word]   |
| 5  | emphysema.mp. [mp=title, abstract, heading word, drug trade name, original title, device manufacturer, drug manufacturer, device trade name, keyword, floating subheading word, candidate term word]                             |
| 6  | bronchitis.mp. [mp=title, abstract, heading word, drug trade name, original title, device manufacturer, drug manufacturer, device trade name, keyword, floating subheading word, candidate term word]                            |
| 7  | bronchiectasis.mp. [mp=title, abstract, heading word, drug trade name, original title, device manufacturer, drug manufacturer, device trade name, keyword, floating subheading word, candidate term word]                        |
| 8  | interstitial lung disease.mp. [mp=title, abstract, heading word, drug trade name, original title, device manufacturer, drug manufacturer, device trade name, keyword, floating subheading word, candidate term word]             |
| 9  | ILD.mp. [mp=title, abstract, heading word, drug trade name, original title, device manufacturer, drug manufacturer, device trade name, keyword, floating subheading word, candidate term word]                                   |
| 10 | cystic fibrosis.mp. [mp=title, abstract, heading word, drug trade name, original title, device manufacturer, drug manufacturer, device trade name, keyword, floating subheading word, candidate term word]                       |
| 11 | pulmonary hypertension.mp. [mp=title, abstract, heading word, drug trade name, original title, device manufacturer, drug manufacturer, device trade name, keyword, floating subheading word, candidate term word]                |

|    |                                                                                                                                                                                                                    |
|----|--------------------------------------------------------------------------------------------------------------------------------------------------------------------------------------------------------------------|
| 12 | PHT.mp. [mp=title, abstract, heading word, drug trade name, original title, device manufacturer, drug manufacturer, device trade name, keyword, floating subheading word, candidate term word]                     |
| 13 | 1 or 2 or 3 or 4 or 5 or 6 or 7 or 8 or 9 or 10 or 11 or 12                                                                                                                                                        |
| 14 | Respiratory Tract Infections/ or Humans/ or Respiratory Tract Diseases/ or Asthma/ or Lung/ or Pulmonary Disease, Chronic Obstructive/                                                                             |
| 15 | Pulmonary Disease, Chronic Obstructive/                                                                                                                                                                            |
| 16 | Pulmonary Disease, Chronic Obstructive/                                                                                                                                                                            |
| 17 | Asthma/ or Pulmonary Disease, Chronic Obstructive/ or Humans/ or Lung Diseases, Obstructive/ or Adult/                                                                                                             |
| 18 | Emphysema/ or Pulmonary Emphysema/                                                                                                                                                                                 |
| 19 | Bronchitis, Chronic/ or Bronchitis/                                                                                                                                                                                |
| 20 | Bronchiectasis/                                                                                                                                                                                                    |
| 21 | Lung Diseases, Interstitial/                                                                                                                                                                                       |
| 22 | Adult/ or Humans/ or Lung Diseases, Interstitial/ or Pulmonary Fibrosis/                                                                                                                                           |
| 23 | Cystic Fibrosis/                                                                                                                                                                                                   |
| 24 | Hypertension, Pulmonary/                                                                                                                                                                                           |
| 25 | Humans/ or Hypertension, Pulmonary/                                                                                                                                                                                |
| 26 | 14 or 15 or 16 or 17 or 18 or 19 or 20 or 21 or 22 or 23 or 24 or 25                                                                                                                                               |
| 27 | 13 and 26                                                                                                                                                                                                          |
| 28 | nitrate.mp. [mp=title, abstract, heading word, drug trade name, original title, device manufacturer, drug manufacturer, device trade name, keyword, floating subheading word, candidate term word]                 |
| 29 | beetroot.mp. [mp=title, abstract, heading word, drug trade name, original title, device manufacturer, drug manufacturer, device trade name, keyword, floating subheading word, candidate term word]                |
| 30 | dietary nitrate.mp. [mp=title, abstract, heading word, drug trade name, original title, device manufacturer, drug manufacturer, device trade name, keyword, floating subheading word, candidate term word]         |
| 31 | nitrate supplementation.mp. [mp=title, abstract, heading word, drug trade name, original title, device manufacturer, drug manufacturer, device trade name, keyword, floating subheading word, candidate term word] |
| 32 | 28 or 29 or 30 or 31                                                                                                                                                                                               |
| 33 | Nitrates/                                                                                                                                                                                                          |
| 34 | Vegetables/ or Nitrites/ or Nitrates/ or Dietary Supplements/ or Beverages/ or Humans/                                                                                                                             |

|    |                                                                                                                |
|----|----------------------------------------------------------------------------------------------------------------|
| 35 | Nitric Oxide/ or Nitrites/ or Diet/ or Nitrates/ or Blood Pressure/ or Humans/ or Dietary Supplements/         |
| 36 | Oxygen Consumption/ or Exercise/ or Dietary Supplements/ or Nitrites/ or Nitrates/ or Nitric Oxide/ or Humans/ |
| 37 | 33 or 34 or 35 or 36                                                                                           |
| 38 | 32 and 37                                                                                                      |
| 39 | 27 and 38                                                                                                      |

**CINAHL (1960 to March 2021)**

|     |                                                                         |
|-----|-------------------------------------------------------------------------|
| S1  | respiratory diseases                                                    |
| S2  | chronic obstructive pulmonary disease                                   |
| S3  | COPD                                                                    |
| S4  | chronic obstructive airways disease                                     |
| S5  | emphysema                                                               |
| S6  | bronchitis                                                              |
| S7  | bronchiectasis                                                          |
| S8  | interstitial lung disease                                               |
| S9  | ILD                                                                     |
| S10 | cystic fibrosis                                                         |
| S11 | pulmonary hypertension                                                  |
| S12 | PHT                                                                     |
| S13 | S1 OR S2 OR S3 OR S4 OR S5 OR S6 OR S7 OR S8 OR S9 OR S10 OR S11 OR S12 |
| S14 | nitrate                                                                 |
| S15 | beetroot                                                                |
| S16 | dietary nitrate                                                         |
| S17 | nitrate supplementation                                                 |
| S18 | S14 OR S15 OR S16 OR S17                                                |
| S19 | S13 AND S18                                                             |

**Cochrane database - up to March 2021:**

|     |                                                                         |
|-----|-------------------------------------------------------------------------|
| ID  | Search                                                                  |
| #1  | respiratory diseases                                                    |
| #2  | chronic obstructive pulmonary disease                                   |
| #3  | COPD                                                                    |
| #4  | chronic obstructive airways disease                                     |
| #5  | emphysema                                                               |
| #6  | bronchitis                                                              |
| #7  | bronchiectasis                                                          |
| #8  | interstitial lung disease                                               |
| #9  | ILD                                                                     |
| #10 | cystic fibrosis                                                         |
| #11 | pulmonary hypertension                                                  |
| #12 | PHT                                                                     |
| #13 | #1 OR #2 OR #3 OR #4 OR #5 OR #6 OR #7 OR #8 OR #9 OR #10 OR #11 OR #12 |
| #14 | nitrate                                                                 |
| #15 | beetroot                                                                |
| #16 | dietary nitrate                                                         |
| #17 | nitrate supplementation                                                 |
| #18 | #14 OR #15 OR #16 OR #17                                                |
| #19 | #13 AND #18                                                             |

**PubMed – up to March 2021**

- 1. respiratory diseases:** "respiration disorders"[MeSH Terms] OR ("respiration"[All Fields] AND "disorders"[All Fields]) OR "respiration disorders"[All Fields] OR ("respiratory"[All Fields] AND "diseases"[All Fields]) OR "respiratory diseases"[All Fields]
- 2. chronic obstructive pulmonary disease:** "pulmonary disease, chronic obstructive"[MeSH Terms] OR ("pulmonary"[All Fields] AND "disease"[All Fields] AND "chronic"[All Fields] AND "obstructive"[All Fields]) OR "chronic obstructive pulmonary disease"[All Fields] OR ("chronic"[All Fields] AND "obstructive"[All Fields] AND "pulmonary"[All Fields] AND "disease"[All Fields])
- 3. COPD:** "pulmonary disease, chronic obstructive"[MeSH Terms] OR ("pulmonary"[All Fields] AND "disease"[All Fields] AND "chronic"[All Fields] AND "obstructive"[All Fields]) OR "chronic obstructive pulmonary disease"[All Fields] OR "copd"[All Fields]
- 4. chronic obstructive airways disease:** "pulmonary disease, chronic obstructive"[MeSH Terms] OR ("pulmonary"[All Fields] AND "disease"[All Fields] AND "chronic"[All Fields] AND "obstructive"[All Fields]) OR "chronic obstructive pulmonary disease"[All Fields] OR ("chronic"[All Fields] AND "obstructive"[All Fields] AND "airways"[All Fields] AND "disease"[All Fields]) OR "chronic obstructive airways disease"[All Fields]
- 5. emphysema:** "emphysema"[MeSH Terms] OR "emphysema"[All Fields] OR "emphysemas"[All Fields] OR "pulmonary emphysema"[MeSH Terms] OR ("pulmonary"[All Fields] AND "emphysema"[All Fields]) OR "pulmonary emphysema"[All Fields]
- 6. bronchitis:** "bronchitis"[MeSH Terms] OR "bronchitis"[All Fields] OR "bronchitides"[All Fields]
- 7. bronchiectasis:** "bronchiectasies"[All Fields] OR "bronchiectasis"[MeSH Terms] OR "bronchiectasis"[All Fields] OR "bronchiectases"[All Fields]
- 8. interstitial lung disease:** "lung diseases, interstitial"[MeSH Terms] OR ("lung"[All Fields] AND "diseases"[All Fields] AND "interstitial"[All Fields]) OR "interstitial lung diseases"[All Fields]

- OR ("interstitial"[All Fields] AND "lung"[All Fields] AND "disease"[All Fields]) OR "interstitial lung disease"[All Fields]
9. **cystic fibrosis:** "cystic fibrosis"[MeSH Terms] OR ("cystic"[All Fields] AND "fibrosis"[All Fields]) OR "cystic fibrosis"[All Fields]
  10. **pulmonary hypertension:** "hypertension, pulmonary"[MeSH Terms] OR ("hypertension"[All Fields] AND "pulmonary"[All Fields]) OR "pulmonary hypertension"[All Fields] OR ("pulmonary"[All Fields] AND "hypertension"[All Fields])
  11. **PHT:** "lung"[MeSH Terms] OR "lung"[All Fields] OR "pulmonary"[All Fields]) AND "hypertension" [All Fields]
  12. **nitrate:** "nitration"[All Fields] OR "nitrates"[MeSH Terms] OR "nitrates"[All Fields] OR "nitrate"[All Fields]
  13. **beetroot:** "beetroot"[All Fields] OR "beetroots"[All Fields]
  14. **dietary:** "diet"[MeSH Terms] OR "diet"[All Fields] OR "dietary"[All Fields] OR "dietaries"[All Fields]
  15. **nitrate:** "nitration"[All Fields] OR "nitrates"[MeSH Terms] OR "nitrates"[All Fields] OR "nitrate"[All Fields]
  16. **nitrate:** "nitration"[All Fields] OR "nitrates"[MeSH Terms] OR "nitrates"[All Fields] OR "nitrate"[All Fields]
  17. **supplementation:** "supplemental"[All Fields] OR "supplementation"[All Fields] OR "supplementation"[All Fields] OR "supplementation's"[All Fields] OR "supplementations"[All Fields] OR "supplementation"[All Fields]
